# Supplementary material for: The effect of chemical variability and weathering on Raman spectra of enargite and fahlore
Source: Copernicus journal article supplement (doi:10.5194/ejm-35-737-2023), 2023-09-04
Supplement: Supplementary file 1 [file ejm-35-737-2023-supplement.pdf]

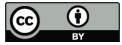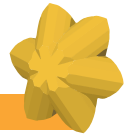

*Supplement of*

## **The effect of chemical variability and weathering on Raman spectra of enargite and fahlore**

**Khulan Berkh et al.**

*Correspondence to:* Khulan Berkh ([khulan.berkh@bgr.de](mailto:khulan.berkh@bgr.de))

The copyright of individual parts of the supplement might differ from the article licence.

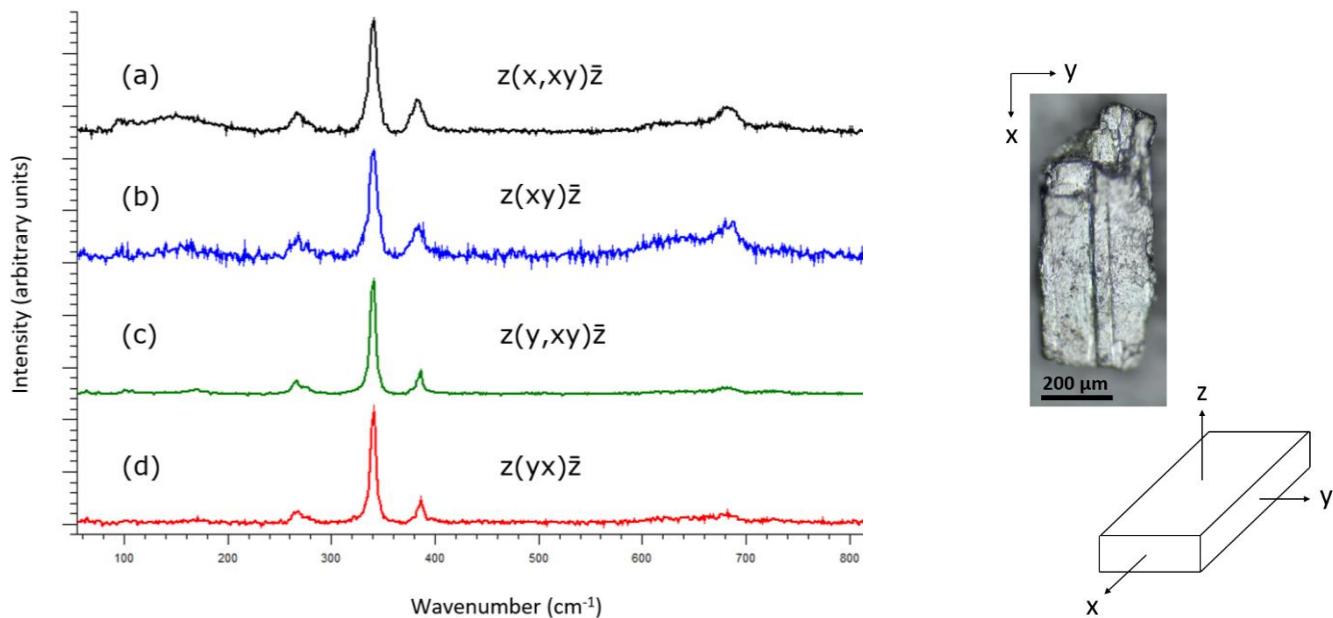

5 **Figure S1:** Raman spectra of enargite depicted in Fig. S1: laser polarization parallel to x, without polarization analyzer (a), laser polarization parallel to x, with polarization analyzer perpendicular to laser polarization (b), laser polarization parallel to y, without a polarization analyzer (c), laser polarization parallel to y, with polarization analyzer perpendicular to laser polarization (d).

**Table S1:** Chemical composition (EPMA) of the studied minerals

| Name     | S      | Fe     | Cu     | Zn     | As     | Ag     | Cd     | Sb     | Te     | Hg     | Pb     | total  |
|----------|--------|--------|--------|--------|--------|--------|--------|--------|--------|--------|--------|--------|
|          | (wt.%) |
| enargite | 31.97  | 0.48   | 47.98  | 0.06   | 17.17  | 0.00   | 0.00   | 0.89   | 0.00   | 0.00   | 0.00   | 98.55  |
| enargite | 31.42  | 0.57   | 47.32  | 0.06   | 16.56  | 0.00   | 0.00   | 0.99   | 0.00   | 0.00   | 0.00   | 96.91  |
| enargite | 32.23  | 0.47   | 47.88  | 0.06   | 17.52  | 0.00   | 0.00   | 0.82   | 0.00   | 0.00   | 0.00   | 98.97  |
| enargite | 32.35  | 0.51   | 47.98  | 0.06   | 17.53  | 0.00   | 0.00   | 0.69   | 0.00   | 0.00   | 0.00   | 99.11  |
| enargite | 32.32  | 0.06   | 48.96  | 0.03   | 17.90  | 0.00   | 0.03   | 0.03   | 0.00   | 0.00   | 0.00   | 99.35  |
| enargite | 30.25  | 0.13   | 48.72  | 0.05   | 16.13  | 0.00   | 0.04   | 0.05   | 0.00   | 0.00   | 0.03   | 95.38  |
| enargite | 32.19  | 0.54   | 48.41  | 0.04   | 17.40  | 0.00   | 0.00   | 0.09   | 0.00   | 0.00   | 0.00   | 98.67  |
| enargite | 31.63  | 0.47   | 48.84  | 0.03   | 17.28  | 0.00   | 0.03   | 0.03   | 0.00   | 0.00   | 0.00   | 98.31  |
| enargite | 31.83  | 0.54   | 48.95  | 0.03   | 17.53  | 0.00   | 0.00   | 0.02   | 0.00   | 0.00   | 0.00   | 98.90  |
| enargite | 31.95  | 0.30   | 49.08  | 0.03   | 17.61  | 0.00   | 0.04   | 0.03   | 0.00   | 0.00   | 0.00   | 99.04  |
| enargite | 31.33  | 0.26   | 49.05  | 0.04   | 17.19  | 0.00   | 0.04   | 0.08   | 0.00   | 0.00   | 0.00   | 97.99  |
| enargite | 31.59  | 0.61   | 49.59  | 0.04   | 16.99  | 0.00   | 0.04   | 0.09   | 0.00   | 0.00   | 0.02   | 98.96  |
| enargite | 31.48  | 0.27   | 48.69  | 0.04   | 16.92  | 0.00   | 0.00   | 0.00   | 0.00   | 0.00   | 0.00   | 97.40  |
| enargite | 31.75  | 0.26   | 49.01  | 0.09   | 16.85  | 0.00   | 0.00   | 0.00   | 0.00   | 0.00   | 0.00   | 97.96  |
| enargite | 33.89  | 0.19   | 45.38  | 0.20   | 20.70  | 0.00   | 0.00   | 0.02   | 0.00   | 0.00   | 0.00   | 100.37 |
| enargite | 32.14  | 0.15   | 48.90  | 0.04   | 17.81  | 0.00   | 0.03   | 0.05   | 0.00   | 0.00   | 0.03   | 99.15  |
| enargite | 31.65  | 0.13   | 49.00  | 0.03   | 17.51  | 0.00   | 0.06   | 0.05   | 0.00   | 0.00   | 0.00   | 98.44  |
| enargite | 31.29  | 0.16   | 48.74  | 0.04   | 17.30  | 0.00   | 0.06   | 0.07   | 0.00   | 0.00   | 0.00   | 97.65  |
| enargite | 31.64  | 0.18   | 48.34  | 0.04   | 17.57  | 0.00   | 0.06   | 0.08   | 0.00   | 0.00   | 0.00   | 97.91  |
| enargite | 32.05  | 0.13   | 48.76  | 0.14   | 17.34  | 0.00   | 0.03   | 0.14   | 0.00   | 0.00   | 0.00   | 98.58  |
| enargite | 31.33  | 0.75   | 47.53  | 0.26   | 15.90  | 0.00   | 0.00   | 1.86   | 0.00   | 0.00   | 0.00   | 97.63  |
| enargite | 31.76  | 0.47   | 48.05  | 0.04   | 17.08  | 0.00   | 0.00   | 0.11   | 0.00   | 0.00   | 0.00   | 97.52  |
| enargite | 31.55  | 0.64   | 47.06  | 0.38   | 15.76  | 0.00   | 0.00   | 3.43   | 0.00   | 0.00   | 0.00   | 98.82  |
| enargite | 31.74  | 0.85   | 47.83  | 0.02   | 18.36  | 0.00   | 0.00   | 0.56   | 0.00   | 0.00   | 0.00   | 99.36  |
| enargite | 32.08  | 0.43   | 48.42  | 0.00   | 18.50  | 0.00   | 0.00   | 0.54   | 0.00   | 0.00   | 0.00   | 99.96  |
| enargite | 31.99  | 0.48   | 48.45  | 0.00   | 18.54  | 0.00   | 0.00   | 0.24   | 0.00   | 0.00   | 0.00   | 99.70  |
| enargite | 31.72  | 0.61   | 47.93  | 0.00   | 17.37  | 0.00   | 0.00   | 1.89   | 0.00   | 0.00   | 0.00   | 99.52  |
| enargite | 31.91  | 0.97   | 47.95  | 0.14   | 18.23  | 0.00   | 0.00   | 0.47   | 0.00   | 0.00   | 0.00   | 99.67  |
| enargite | 31.50  | 0.93   | 47.43  | 0.12   | 18.33  | 0.00   | 0.00   | 0.75   | 0.00   | 0.00   | 0.00   | 99.05  |
| enargite | 31.30  | 0.76   | 47.67  | 0.26   | 15.38  | 0.00   | 0.00   | 2.23   | 0.01   | 0.00   | 0.02   | 97.63  |
| enargite | 32.16  | 0.82   | 48.29  | 0.07   | 16.61  | 0.00   | 0.00   | 0.13   | 0.01   | 0.00   | 0.00   | 98.10  |
| enargite | 31.92  | 0.53   | 48.49  | 0.05   | 17.43  | 0.00   | 0.00   | 0.11   | 0.01   | 0.02   | 0.00   | 98.57  |
| enargite | 32.36  | 0.55   | 47.92  | 0.06   | 17.25  | 0.00   | 0.00   | 0.85   | 0.01   | 0.00   | 0.00   | 99.01  |
| enargite | 31.19  | 0.87   | 47.72  | 0.04   | 16.63  | 0.00   | 0.00   | 0.32   | 0.02   | 0.00   | 0.00   | 96.78  |

| Name     | S      | Fe     | Cu     | Zn     | As     | Ag     | Cd     | Sb     | Te     | Hg     | Pb     | total  |
|----------|--------|--------|--------|--------|--------|--------|--------|--------|--------|--------|--------|--------|
|          | (wt.%) |
| enargite | 31.58  | 0.62   | 47.23  | 0.17   | 15.19  | 0.00   | 0.00   | 3.85   | 0.02   | 0.00   | 0.00   | 98.66  |
| enargite | 32.05  | 0.51   | 47.65  | 0.05   | 17.30  | 0.00   | 0.00   | 0.86   | 0.02   | 0.00   | 0.00   | 98.44  |
| enargite | 31.94  | 0.55   | 47.98  | 0.08   | 16.96  | 0.00   | 0.00   | 1.08   | 0.02   | 0.00   | 0.00   | 98.62  |
| enargite | 31.86  | 0.16   | 48.57  | 0.39   | 17.62  | 0.00   | 0.00   | 0.08   | 0.02   | 0.00   | 0.00   | 98.69  |
| enargite | 31.84  | 1.08   | 48.25  | 0.00   | 17.95  | 0.00   | 0.00   | 0.44   | 0.02   | 0.00   | 0.00   | 99.58  |
| enargite | 31.93  | 0.74   | 48.31  | 0.00   | 18.58  | 0.00   | 0.00   | 0.15   | 0.02   | 0.00   | 0.00   | 99.73  |
| enargite | 31.92  | 0.71   | 48.20  | 0.06   | 18.26  | 0.00   | 0.00   | 0.41   | 0.02   | 0.00   | 0.00   | 99.58  |
| enargite | 31.56  | 0.73   | 48.17  | 0.03   | 18.65  | 0.00   | 0.00   | 0.21   | 0.02   | 0.00   | 0.00   | 99.37  |
| enargite | 31.76  | 0.65   | 47.75  | 0.08   | 18.18  | 0.00   | 0.00   | 0.77   | 0.03   | 0.00   | 0.00   | 99.21  |
| enargite | 31.63  | 0.49   | 48.33  | 0.04   | 18.29  | 0.00   | 0.00   | 0.24   | 0.03   | 0.00   | 0.00   | 99.05  |
| enargite | 30.71  | 0.46   | 46.97  | 0.50   | 13.95  | 0.00   | 0.00   | 3.83   | 0.03   | 0.00   | 0.00   | 96.44  |
| enargite | 31.93  | 0.56   | 47.89  | 0.07   | 17.45  | 0.00   | 0.00   | 0.73   | 0.03   | 0.00   | 0.00   | 98.66  |
| enargite | 32.72  | 0.21   | 48.63  | 0.10   | 17.94  | 0.00   | 0.00   | 0.12   | 0.03   | 0.00   | 0.00   | 99.76  |
| enargite | 31.17  | 0.59   | 47.13  | 0.44   | 14.15  | 0.00   | 0.00   | 3.06   | 0.03   | 0.00   | 0.02   | 96.59  |
| enargite | 32.03  | 0.82   | 47.45  | 0.09   | 16.32  | 0.00   | 0.00   | 1.91   | 0.04   | 0.00   | 0.03   | 98.70  |
| enargite | 31.95  | 0.64   | 47.95  | 0.03   | 18.67  | 0.00   | 0.00   | 0.35   | 0.04   | 0.00   | 0.00   | 99.63  |
| enargite | 31.16  | 0.50   | 46.63  | 0.61   | 13.72  | 0.00   | 0.00   | 3.19   | 0.04   | 0.00   | 0.26   | 96.11  |
| enargite | 31.86  | 0.55   | 46.77  | 0.48   | 14.68  | 0.00   | 0.00   | 3.02   | 0.04   | 0.00   | 0.00   | 97.40  |
| enargite | 31.71  | 0.74   | 48.10  | 0.07   | 18.41  | 0.00   | 0.00   | 0.52   | 0.04   | 0.00   | 0.00   | 99.59  |
| enargite | 30.99  | 0.65   | 46.30  | 0.98   | 13.19  | 0.00   | 0.00   | 3.39   | 0.07   | 0.00   | 0.00   | 95.56  |
| enargite | 31.94  | 0.60   | 47.67  | 0.09   | 17.27  | 0.00   | 0.00   | 0.89   | 0.05   | 0.00   | 0.00   | 98.51  |
| enargite | 31.27  | 0.53   | 46.85  | 0.68   | 14.08  | 0.00   | 0.00   | 2.89   | 0.05   | 0.00   | 0.00   | 96.35  |
| enargite | 31.74  | 0.55   | 47.99  | 0.10   | 16.48  | 0.00   | 0.00   | 1.12   | 0.07   | 0.00   | 0.11   | 98.16  |
| enargite | 31.66  | 0.55   | 48.05  | 0.06   | 16.59  | 0.00   | 0.00   | 1.25   | 0.08   | 0.00   | 0.04   | 98.27  |
| enargite | 31.72  | 0.71   | 47.97  | 0.09   | 17.03  | 0.00   | 0.00   | 1.30   | 0.09   | 0.00   | 0.00   | 98.90  |
| enargite | 31.58  | 0.61   | 47.98  | 0.11   | 18.24  | 0.00   | 0.00   | 0.59   | 0.10   | 0.00   | 0.00   | 99.21  |
| enargite | 30.67  | 0.62   | 47.51  | 0.10   | 16.18  | 0.00   | 0.00   | 2.01   | 0.16   | 0.00   | 0.04   | 97.30  |
| enargite | 31.40  | 0.71   | 46.96  | 0.07   | 16.52  | 0.00   | 0.00   | 0.62   | 0.19   | 0.00   | 0.00   | 96.46  |
| enargite | 31.79  | 0.65   | 47.43  | 0.09   | 16.24  | 0.00   | 0.00   | 0.58   | 0.23   | 0.04   | 0.03   | 97.07  |
| enargite | 31.55  | 0.65   | 47.57  | 0.08   | 16.44  | 0.00   | 0.00   | 0.57   | 0.27   | 0.00   | 0.05   | 97.18  |
| enargite | 31.44  | 0.82   | 47.16  | 0.11   | 15.82  | 0.00   | 0.00   | 0.82   | 0.36   | 0.04   | 0.05   | 96.62  |
| enargite | 31.52  | 0.69   | 47.33  | 0.10   | 16.12  | 0.00   | 0.00   | 0.66   | 0.38   | 0.03   | 0.04   | 96.87  |
| enargite | 31.67  | 0.68   | 47.41  | 0.11   | 15.94  | 0.00   | 0.00   | 0.44   | 0.40   | 0.00   | 0.04   | 96.69  |
| enargite | 31.99  | 1.16   | 47.54  | 0.04   | 17.44  | 0.00   | 0.03   | 0.06   | 0.00   | 0.00   | 0.00   | 98.27  |
| enargite | 31.52  | 0.80   | 47.87  | 0.39   | 16.95  | 0.00   | 0.00   | 0.38   | 0.00   | 0.03   | 0.05   | 97.99  |

| Name     | S      | Fe     | Cu     | Zn     | As     | Ag     | Cd     | Sb     | Te     | Hg     | Pb     | total  |
|----------|--------|--------|--------|--------|--------|--------|--------|--------|--------|--------|--------|--------|
|          | (wt.%) |
| enargite | 32.08  | 0.82   | 47.78  | 0.50   | 18.37  | 0.00   | 0.00   | 0.10   | 0.00   | 0.00   | 0.00   | 99.65  |
| enargite | 31.90  | 1.41   | 47.69  | 0.04   | 18.21  | 0.00   | 0.00   | 0.99   | 0.00   | 0.00   | 0.00   | 100.24 |
| enargite | 30.89  | 1.14   | 46.24  | 0.05   | 15.56  | 0.00   | 0.00   | 3.81   | 0.00   | 0.00   | 0.00   | 97.69  |
| enargite | 31.40  | 0.72   | 47.32  | 0.48   | 14.84  | 0.00   | 0.00   | 2.12   | 0.02   | 0.00   | 0.04   | 96.94  |
| enargite | 31.74  | 1.01   | 47.03  | 0.43   | 15.42  | 0.00   | 0.00   | 2.21   | 0.02   | 0.00   | 0.04   | 97.90  |
| enargite | 33.46  | 1.83   | 41.67  | 0.60   | 15.95  | 0.00   | 0.00   | 2.83   | 0.02   | 0.00   | 0.00   | 96.36  |
| enargite | 31.35  | 1.06   | 46.28  | 0.89   | 14.84  | 0.00   | 0.04   | 2.84   | 0.04   | 0.00   | 0.31   | 97.63  |
| enargite | 31.30  | 0.46   | 46.91  | 0.79   | 14.59  | 0.00   | 0.00   | 3.07   | 0.05   | 0.00   | 0.02   | 97.19  |
| enargite | 31.28  | 1.26   | 45.67  | 0.73   | 14.08  | 0.00   | 0.06   | 3.43   | 0.06   | 0.00   | 0.02   | 96.59  |
| enargite | 31.89  | 1.02   | 47.09  | 0.14   | 15.54  | 0.00   | 0.00   | 1.74   | 0.07   | 0.00   | 0.06   | 97.54  |
| enargite | 31.62  | 0.80   | 46.33  | 0.57   | 14.07  | 0.00   | 0.00   | 3.36   | 0.07   | 0.00   | 0.00   | 96.82  |
| enargite | 31.52  | 0.84   | 46.16  | 0.67   | 13.98  | 0.00   | 0.00   | 3.19   | 0.08   | 0.00   | 0.00   | 96.45  |
| enargite | 33.73  | 0.95   | 46.05  | 0.80   | 14.45  | 0.00   | 0.00   | 3.72   | 0.09   | 0.00   | 0.00   | 99.79  |
| enargite | 32.16  | 1.05   | 45.70  | 1.11   | 12.16  | 0.00   | 0.00   | 4.87   | 0.09   | 0.00   | 0.00   | 97.14  |
| enargite | 32.88  | 0.24   | 47.82  | 1.60   | 19.02  | 0.00   | 0.00   | 0.18   | 0.14   | 0.00   | 0.00   | 101.88 |
| enargite | 31.63  | 1.07   | 47.46  | 0.09   | 16.00  | 0.00   | 0.00   | 0.63   | 0.31   | 0.00   | 0.05   | 97.24  |
| enargite | 31.43  | 0.85   | 47.23  | 0.10   | 15.75  | 0.00   | 0.00   | 0.69   | 0.54   | 0.00   | 0.05   | 96.63  |
| enargite | 31.61  | 0.52   | 48.31  | 0.05   | 17.35  | 0.00   | 0.00   | 0.56   | 0.91   | 0.00   | 0.00   | 99.31  |
| enargite | 31.72  | 0.37   | 47.85  | 0.12   | 17.35  | 0.00   | 0.00   | 1.06   | 1.24   | 0.00   | 0.00   | 99.71  |
| enargite | 32.48  | 0.99   | 46.37  | 0.01   | 17.22  | 0.08   | 0.17   | 0.62   | 0.19   | 0.00   | 0.02   | 98.15  |
| enargite | 32.73  | 0.90   | 46.15  | 0.03   | 15.18  | 0.04   | 0.04   | 0.54   | 0.28   | 0.00   | 0.03   | 95.94  |
| enargite | 32.51  | 1.03   | 45.53  | 0.06   | 16.64  | 0.12   | 0.21   | 0.75   | 0.29   | 0.03   | 0.00   | 97.17  |
| enargite | 32.51  | 0.91   | 46.19  | 0.02   | 17.09  | 0.10   | 0.20   | 0.66   | 0.41   | 0.00   | 0.03   | 98.12  |
| enargite | 32.15  | 0.43   | 45.80  | 0.31   | 16.72  | 0.06   | 0.17   | 1.01   | 0.65   | 0.00   | 0.00   | 97.31  |
| enargite | 32.02  | 0.47   | 45.86  | 0.23   | 16.99  | 0.08   | 0.17   | 0.79   | 0.65   | 0.00   | 0.00   | 97.28  |
| enargite | 31.49  | 1.19   | 45.05  | 0.00   | 16.60  | 0.21   | 0.31   | 0.86   | 0.67   | 0.06   | 0.15   | 96.60  |
| enargite | 32.68  | 0.50   | 45.84  | 0.30   | 16.50  | 0.08   | 0.15   | 1.05   | 0.74   | 0.00   | 0.00   | 97.85  |
| enargite | 30.85  | 0.97   | 45.74  | 1.01   | 11.49  | 0.00   | 0.00   | 4.82   | 0.08   | 0.00   | 0.00   | 94.97  |
| enargite | 32.64  | 0.56   | 45.89  | 0.21   | 16.32  | 0.08   | 0.17   | 1.11   | 0.96   | 0.00   | 0.00   | 97.93  |
| enargite | 32.53  | 0.87   | 45.75  | 0.00   | 17.11  | 0.06   | 0.15   | 0.89   | 1.30   | 0.00   | 0.00   | 98.67  |
| enargite | 31.98  | 1.24   | 45.43  | 0.00   | 17.22  | 0.06   | 0.15   | 0.68   | 1.47   | 0.00   | 0.00   | 98.23  |
| enargite | 32.87  | 0.77   | 45.94  | 0.00   | 16.91  | 0.10   | 0.16   | 0.94   | 1.56   | 0.00   | 0.00   | 99.26  |
| enargite | 32.58  | 0.70   | 44.81  | 0.00   | 17.71  | 0.12   | 0.21   | 0.88   | 1.87   | 0.04   | 0.02   | 98.94  |
| enargite | 32.02  | 0.38   | 45.63  | 0.00   | 16.59  | 0.08   | 0.14   | 0.78   | 1.99   | 0.00   | 0.00   | 97.61  |
| enargite | 32.85  | 1.26   | 45.05  | 0.00   | 16.44  | 0.09   | 0.13   | 0.70   | 2.49   | 0.00   | 0.00   | 99.01  |

| Name       | S      | Fe     | Cu     | Zn     | As     | Ag     | Cd     | Sb     | Te     | Hg     | Pb     | total  |
|------------|--------|--------|--------|--------|--------|--------|--------|--------|--------|--------|--------|--------|
|            | (wt.%) |
| enargite   | 32.58  | 1.08   | 45.11  | 0.00   | 16.18  | 0.12   | 0.15   | 0.77   | 3.15   | 0.00   | 0.00   | 99.14  |
| enargite   | 31.72  | 0.41   | 45.63  | 0.01   | 16.60  | 0.12   | 0.18   | 0.83   | 1.61   | 0.00   | 0.00   | 97.10  |
| enargite   | 33.06  | 0.63   | 46.08  | 0.02   | 16.96  | 0.09   | 0.16   | 0.76   | 1.08   | 0.00   | 0.00   | 98.84  |
| enargite   | 31.97  | 1.02   | 45.00  | 0.02   | 16.51  | 0.12   | 0.13   | 0.70   | 2.36   | 0.00   | 0.00   | 97.82  |
| enargite   | 31.02  | 0.46   | 45.38  | 0.02   | 16.92  | 0.11   | 0.20   | 0.64   | 1.40   | 0.00   | 0.00   | 96.15  |
| enargite   | 30.53  | 0.62   | 45.36  | 1.76   | 11.61  | 0.00   | 0.00   | 4.50   | 0.15   | 0.00   | 0.00   | 94.53  |
| enargite   | 31.97  | 0.45   | 46.28  | 0.02   | 16.13  | 0.02   | 0.06   | 0.71   | 1.56   | 0.00   | 0.00   | 97.21  |
| enargite   | 32.08  | 0.39   | 46.22  | 0.03   | 16.77  | 0.09   | 0.17   | 0.92   | 1.29   | 0.03   | 0.00   | 97.98  |
| enargite   | 32.76  | 0.42   | 45.84  | 0.03   | 16.71  | 0.09   | 0.16   | 0.64   | 2.50   | 0.00   | 0.00   | 99.15  |
| enargite   | 30.52  | 0.77   | 45.50  | 1.28   | 11.68  | 0.00   | 0.00   | 4.84   | 0.10   | 0.00   | 0.00   | 94.68  |
| enargite   | 31.26  | 1.01   | 45.59  | 1.19   | 11.46  | 0.00   | 0.00   | 4.91   | 0.09   | 0.00   | 0.00   | 95.52  |
| enargite   | 32.86  | 0.50   | 45.83  | 0.05   | 17.32  | 0.09   | 0.16   | 0.73   | 1.61   | 0.00   | 0.00   | 99.15  |
| enargite   | 33.52  | 0.65   | 44.31  | 0.06   | 18.85  | 0.05   | 0.09   | 0.88   | 1.51   | 0.00   | 0.00   | 99.91  |
| enargite   | 31.13  | 0.40   | 45.93  | 0.12   | 16.47  | 0.10   | 0.16   | 1.08   | 1.23   | 0.00   | 0.00   | 96.62  |
| enargite   | 32.34  | 0.42   | 45.95  | 0.17   | 16.80  | 0.10   | 0.16   | 0.94   | 1.02   | 0.00   | 0.00   | 97.88  |
| enargite   | 31.84  | 0.43   | 45.10  | 1.17   | 16.47  | 0.08   | 0.14   | 0.79   | 2.07   | 0.00   | 0.06   | 98.16  |
| enargite   | 32.09  | 1.45   | 46.18  | 0.12   | 15.99  | 0.00   | 0.00   | 1.03   | 0.71   | 0.03   | 0.06   | 97.65  |
| enargite   | 31.89  | 1.68   | 45.99  | 0.09   | 15.84  | 0.00   | 0.00   | 0.73   | 1.92   | 0.00   | 0.04   | 98.17  |
| tennantite | 28.67  | 3.18   | 45.85  | 2.01   | 19.10  | 0.00   | 0.00   | 1.64   | 0.09   | 0.05   | 0.00   | 100.60 |
| tennantite | 28.92  | 3.14   | 46.01  | 2.00   | 18.61  | 0.00   | 0.00   | 1.91   | 0.02   | 0.05   | 0.08   | 100.73 |
| tennantite | 28.75  | 3.31   | 45.10  | 2.19   | 18.86  | 0.00   | 0.00   | 2.24   | 0.13   | 0.04   | 0.00   | 100.62 |
| tennantite | 27.90  | 2.92   | 46.28  | 2.37   | 16.07  | 0.00   | 0.00   | 2.27   | 0.07   | 0.00   | 0.00   | 97.87  |
| tennantite | 27.47  | 2.99   | 44.34  | 2.61   | 14.44  | 0.00   | 0.00   | 7.96   | 0.07   | 0.04   | 0.04   | 99.95  |
| tennantite | 28.55  | 0.47   | 47.26  | 2.94   | 17.62  | 0.00   | 0.00   | 0.26   | 0.09   | 0.00   | 0.00   | 97.20  |
| tennantite | 28.91  | 0.42   | 47.31  | 2.80   | 17.30  | 0.00   | 0.00   | 0.35   | 0.16   | 0.00   | 0.03   | 97.28  |
| tennantite | 25.26  | 1.49   | 45.07  | 1.56   | 8.05   | 0.00   | 0.00   | 5.89   | 12.98  | 0.00   | 0.00   | 100.30 |
| tennantite | 27.58  | 1.00   | 41.49  | 8.65   | 17.18  | 0.00   | 0.05   | 2.60   | 0.22   | 0.16   | 0.00   | 98.92  |
| tennantite | 27.85  | 2.40   | 44.64  | 4.03   | 19.88  | 0.00   | 0.04   | 1.06   | 0.00   | 0.00   | 0.00   | 99.90  |
| tennantite | 27.62  | 3.66   | 46.57  | 1.50   | 18.47  | 0.00   | 0.00   | 1.26   | 0.04   | 0.00   | 0.00   | 99.11  |
| tennantite | 28.14  | 0.84   | 43.13  | 7.44   | 20.11  | 0.00   | 0.08   | 0.02   | 0.02   | 0.00   | 0.00   | 99.79  |
| tennantite | 27.82  | 3.35   | 47.44  | 0.89   | 20.27  | 0.00   | 0.00   | 0.23   | 0.03   | 0.00   | 0.00   | 100.04 |
| tennantite | 26.99  | 4.42   | 45.12  | 1.77   | 15.92  | 0.00   | 0.00   | 5.27   | 0.00   | 0.00   | 0.00   | 99.49  |
| tennantite | 25.78  | 2.17   | 41.49  | 4.51   | 9.69   | 0.00   | 0.00   | 14.62  | 1.89   | 0.06   | 0.09   | 100.31 |
| tennantite | 27.34  | 2.96   | 43.61  | 4.03   | 18.64  | 0.00   | 0.03   | 1.93   | 0.11   | 0.07   | 0.00   | 98.73  |
| tennantite | 27.27  | 3.18   | 42.13  | 4.50   | 16.77  | 0.00   | 0.04   | 5.07   | 0.00   | 0.00   | 0.04   | 99.00  |

| Name         | S      | Fe     | Cu     | Zn     | As     | Ag     | Cd     | Sb     | Te     | Hg     | Pb     | total  |
|--------------|--------|--------|--------|--------|--------|--------|--------|--------|--------|--------|--------|--------|
|              | (wt.%) |
| tennantite   | 27.14  | 2.33   | 44.30  | 3.90   | 18.02  | 0.00   | 0.02   | 3.95   | 0.10   | 0.05   | 0.00   | 99.80  |
| tennantite   | 27.02  | 1.84   | 41.45  | 8.35   | 19.03  | 0.00   | 0.11   | 1.01   | 0.86   | 0.00   | 0.00   | 99.68  |
| tennantite   | 24.69  | 1.80   | 42.41  | 8.55   | 12.08  | 0.00   | 0.07   | 8.44   | 0.71   | 0.00   | 0.24   | 98.98  |
| tennantite   | 29.88  | 3.34   | 40.86  | 6.50   | 18.78  | 0.00   | 0.09   | 0.23   | 0.00   | 0.00   | 0.09   | 99.78  |
| tennantite   | 28.28  | 3.32   | 39.25  | 6.97   | 18.26  | 0.00   | 0.10   | 0.53   | 0.12   | 0.00   | 0.05   | 96.88  |
| tennantite   | 26.78  | 2.81   | 41.17  | 6.29   | 13.05  | 0.03   | 0.02   | 10.57  | 0.06   | 0.00   | 0.00   | 100.79 |
| tennantite   | 26.70  | 0.93   | 42.53  | 9.49   | 19.34  | 0.00   | 0.04   | 0.03   | 0.00   | 0.00   | 0.05   | 99.10  |
| tennantite   | 25.71  | 1.70   | 42.27  | 7.76   | 14.34  | 0.00   | 0.06   | 6.50   | 0.03   | 0.00   | 0.00   | 98.37  |
| tennantite   | 27.05  | 2.63   | 44.66  | 3.75   | 18.24  | 0.00   | 0.02   | 3.19   | 0.10   | 0.00   | 0.00   | 99.64  |
| tennantite   | 28.29  | 0.69   | 50.79  | 0.18   | 18.11  | 0.03   | 0.00   | 2.17   | 0.00   | 0.03   | 0.00   | 100.28 |
| tennantite   | 26.65  | 0.32   | 51.15  | 0.07   | 17.51  | 0.11   | 0.12   | 1.85   | 0.01   | 0.06   | 0.07   | 97.91  |
| tennantite   | 27.40  | 0.43   | 49.42  | 0.15   | 17.95  | 0.30   | 0.15   | 0.23   | 0.00   | 0.00   | 0.06   | 96.08  |
| tennantite   | 28.00  | 0.40   | 49.08  | 0.13   | 16.63  | 1.00   | 0.06   | 2.57   | 0.00   | 0.00   | 0.20   | 98.07  |
| tennantite   | 28.19  | 0.44   | 51.45  | 0.05   | 18.03  | 0.00   | 0.00   | 2.11   | 0.00   | 0.00   | 0.00   | 100.27 |
| tennantite   | 28.58  | 0.31   | 51.90  | 0.05   | 18.96  | 0.00   | 0.00   | 1.41   | 0.00   | 0.00   | 0.00   | 101.20 |
| tennantite   | 28.17  | 0.20   | 51.96  | 0.05   | 18.56  | 0.06   | 0.00   | 1.01   | 0.00   | 0.00   | 0.00   | 100.01 |
| tennantite   | 27.70  | 1.87   | 48.81  | 1.30   | 19.94  | 0.00   | 0.00   | 0.54   | 0.00   | 0.00   | 0.00   | 100.16 |
| tennantite   | 27.42  | 1.86   | 43.15  | 6.31   | 18.51  | 0.00   | 0.06   | 2.41   | 0.00   | 0.04   | 0.00   | 99.77  |
| tennantite   | 28.35  | 0.94   | 50.79  | 0.22   | 19.80  | 0.02   | 0.00   | 0.44   | 0.00   | 0.00   | 0.00   | 100.55 |
| tennantite   | 27.77  | 2.82   | 48.29  | 1.16   | 20.29  | 0.00   | 0.00   | 0.22   | 0.00   | 0.00   | 0.00   | 100.55 |
| tennantite   | 27.58  | 2.72   | 48.31  | 0.47   | 17.59  | 0.00   | 0.00   | 3.49   | 0.00   | 0.10   | 0.00   | 100.26 |
| tennantite   | 26.91  | 1.87   | 49.26  | 0.20   | 18.89  | 0.00   | 0.00   | 2.02   | 0.00   | 0.04   | 0.00   | 99.20  |
| tennantite   | 26.97  | 1.55   | 49.95  | 0.18   | 19.07  | 0.00   | 0.00   | 1.87   | 0.02   | 0.04   | 0.00   | 99.67  |
| tennantite   | 26.35  | 0.46   | 51.23  | 0.03   | 18.98  | 0.13   | 0.00   | 2.69   | 0.00   | 0.00   | 0.00   | 99.87  |
| tetrahedrite | 25.57  | 2.73   | 39.90  | 4.02   | 2.83   | 0.00   | 0.00   | 21.69  | 0.03   | 0.00   | 0.00   | 96.76  |
| tetrahedrite | 25.49  | 2.62   | 39.66  | 4.65   | 1.40   | 0.00   | 0.00   | 25.07  | 0.01   | 0.00   | 0.00   | 98.89  |
| tetrahedrite | 26.70  | 3.16   | 41.40  | 3.42   | 4.75   | 0.00   | 0.00   | 22.08  | 0.03   | 0.00   | 0.00   | 101.55 |
| tetrahedrite | 26.66  | 2.82   | 42.08  | 3.16   | 7.73   | 0.00   | 0.00   | 13.48  | 0.15   | 0.00   | 0.00   | 96.08  |
| tetrahedrite | 26.79  | 2.60   | 41.38  | 3.21   | 8.34   | 0.00   | 0.00   | 17.44  | 0.10   | 0.00   | 0.00   | 99.86  |
| tetrahedrite | 25.85  | 2.21   | 39.82  | 3.29   | 4.87   | 0.00   | 0.00   | 25.54  | 0.11   | 0.00   | 0.00   | 101.68 |
| tetrahedrite | 26.71  | 2.67   | 41.88  | 3.28   | 10.19  | 0.00   | 0.00   | 16.83  | 0.03   | 0.00   | 0.03   | 101.62 |
| tetrahedrite | 26.89  | 5.39   | 39.11  | 3.56   | 4.15   | 0.00   | 0.00   | 20.78  | 0.09   | 0.00   | 0.00   | 99.98  |
| tetrahedrite | 25.71  | 1.62   | 39.99  | 6.58   | 7.94   | 0.00   | 0.06   | 19.04  | 0.02   | 0.00   | 0.00   | 100.96 |
| tetrahedrite | 24.31  | 1.17   | 41.08  | 4.46   | 3.53   | 0.00   | 0.00   | 20.63  | 5.15   | 0.06   | 0.00   | 100.39 |
| tetrahedrite | 24.66  | 0.98   | 37.40  | 8.35   | 6.52   | 1.15   | 0.03   | 21.40  | 0.00   | 0.00   | 0.00   | 100.48 |

| Name            | S      | Fe     | Cu     | Zn     | As     | Ag     | Cd     | Sb     | Te     | Hg     | Pb     | total  |
|-----------------|--------|--------|--------|--------|--------|--------|--------|--------|--------|--------|--------|--------|
|                 | (wt.%) |
| tetrahedrite    | 24.30  | 2.78   | 42.71  | 2.99   | 6.21   | 0.16   | 0.00   | 17.65  | 0.04   | 0.00   | 0.00   | 96.83  |
| tetrahedrite    | 24.48  | 1.96   | 36.78  | 5.69   | 5.47   | 0.00   | 0.00   | 24.67  | 0.04   | 0.00   | 0.00   | 99.09  |
| goldfieldite    | 25.69  | 0.67   | 43.37  | 0.53   | 3.71   | 0.00   | 0.00   | 7.26   | 16.28  | 0.00   | 0.00   | 97.51  |
| goldfieldite    | 24.84  | 0.44   | 45.21  | 0.17   | 1.80   | 0.00   | 0.00   | 10.01  | 15.95  | 0.00   | 0.00   | 98.43  |
| goldfieldite    | 25.34  | 0.96   | 44.05  | 0.94   | 2.26   | 0.00   | 0.00   | 8.54   | 14.13  | 0.00   | 0.00   | 96.22  |
| goldfieldite    | 25.49  | 0.63   | 43.69  | 0.55   | 2.61   | 0.00   | 0.00   | 7.41   | 15.84  | 0.00   | 0.00   | 96.21  |
| goldfieldite    | 25.28  | 0.42   | 44.31  | 0.18   | 2.04   | 0.00   | 0.00   | 9.85   | 16.21  | 0.00   | 0.00   | 98.30  |
| goldfieldite    | 23.28  | 0.65   | 46.18  | 0.50   | 2.40   | 0.00   | 0.00   | 7.85   | 13.60  | 0.00   | 0.00   | 94.47  |
| goldfieldite    | 25.43  | 1.34   | 43.47  | 1.07   | 4.39   | 0.00   | 0.00   | 7.29   | 12.52  | 0.00   | 0.00   | 95.52  |
| secondary phase | 28.11  | 2.04   | 44.56  | 0.36   | 16.38  | 0.20   | 0.16   | 0.47   | 0.00   | 0.00   | 0.03   | 92.32  |
| secondary phase | 27.96  | 1.79   | 45.37  | 0.51   | 16.33  | 0.29   | 0.17   | 0.40   | 0.00   | 0.00   | 0.02   | 92.85  |
| secondary phase | 25.92  | 2.14   | 45.99  | 0.41   | 15.05  | 0.20   | 0.00   | 0.79   | 0.00   | 0.00   | 0.00   | 90.50  |
| secondary phase | 28.90  | 1.25   | 46.53  | 0.35   | 15.92  | 0.00   | 0.00   | 0.84   | 0.00   | 0.00   | 0.00   | 93.79  |
| secondary phase | 26.30  | 1.31   | 46.69  | 0.43   | 10.73  | 0.00   | 0.00   | 0.90   | 0.00   | 0.00   | 0.00   | 86.36  |
| secondary phase | 26.93  | 1.05   | 45.59  | 0.35   | 13.51  | 0.10   | 0.00   | 0.32   | 0.00   | 0.00   | 0.00   | 87.85  |
| secondary phase | 14.27  | 1.90   | 43.41  | 0.58   | 3.05   | 0.00   | 0.00   | 0.00   | 0.00   | 0.00   | 0.00   | 63.21  |
| secondary phase | 26.85  | 1.14   | 45.56  | 0.23   | 15.27  | 0.19   | 0.00   | 0.36   | 0.00   | 0.00   | 0.03   | 89.64  |
| secondary phase | 24.02  | 1.16   | 45.18  | 0.27   | 14.81  | 0.10   | 0.00   | 0.29   | 0.00   | 0.00   | 0.04   | 85.86  |
| secondary phase | 17.49  | 2.06   | 44.70  | 0.65   | 8.45   | 0.00   | 0.00   | 0.00   | 0.00   | 0.00   | 0.00   | 73.35  |
| secondary phase | 29.64  | 1.23   | 42.26  | 0.23   | 19.32  | 0.31   | 0.30   | 0.45   | 0.00   | 0.03   | 0.05   | 93.82  |
| secondary phase | 27.17  | 1.35   | 43.19  | 0.29   | 17.39  | 0.29   | 0.21   | 0.39   | 0.00   | 0.03   | 0.07   | 90.39  |
| secondary phase | 26.27  | 1.09   | 46.57  | 0.20   | 17.86  | 0.25   | 0.15   | 0.42   | 0.00   | 0.04   | 0.07   | 92.92  |
| secondary phase | 27.95  | 0.90   | 47.52  | 0.81   | 17.15  | 0.20   | 0.10   | 1.79   | 0.00   | 0.00   | 0.04   | 96.45  |
| secondary phase | 25.62  | 1.60   | 44.50  | 0.60   | 12.69  | 0.00   | 0.00   | 1.28   | 0.00   | 0.00   | 0.00   | 86.29  |
| secondary phase | 26.43  | 1.69   | 46.08  | 0.83   | 13.47  | 0.00   | 0.00   | 1.21   | 0.00   | 0.00   | 0.00   | 89.71  |
| secondary phase | 24.12  | 1.70   | 45.85  | 1.17   | 15.33  | 0.13   | 0.08   | 1.01   | 0.00   | 0.00   | 0.00   | 89.38  |
| secondary phase | 20.09  | 0.60   | 52.01  | 0.10   | 9.71   | 0.00   | 0.00   | 1.22   | 0.00   | 0.00   | 0.00   | 83.73  |
| secondary phase | 14.22  | 0.41   | 47.82  | 0.30   | 3.36   | 0.00   | 0.00   | 0.38   | 0.00   | 0.00   | 0.00   | 66.50  |
| secondary phase | 17.15  | 0.50   | 48.70  | 0.38   | 4.27   | 0.00   | 0.00   | 0.74   | 0.00   | 0.00   | 0.00   | 71.73  |
| secondary phase | 24.93  | 0.43   | 49.36  | 0.29   | 8.80   | 0.00   | 0.00   | 2.23   | 0.00   | 0.00   | 0.00   | 86.03  |
| secondary phase | 25.20  | 0.63   | 50.25  | 0.96   | 11.22  | 0.09   | 0.00   | 1.67   | 0.00   | 0.00   | 0.00   | 90.02  |
| secondary phase | 21.95  | 0.72   | 52.29  | 0.34   | 11.32  | 0.21   | 0.00   | 0.81   | 0.00   | 0.00   | 0.00   | 87.65  |
| secondary phase | 23.73  | 0.49   | 51.85  | 0.21   | 10.87  | 0.27   | 0.00   | 1.52   | 0.00   | 0.00   | 0.02   | 88.96  |
| secondary phase | 23.49  | 0.51   | 52.09  | 0.20   | 10.89  | 0.27   | 0.00   | 1.28   | 0.00   | 0.00   | 0.02   | 88.75  |
| secondary phase | 26.38  | 0.19   | 50.70  | 0.17   | 11.24  | 0.08   | 0.00   | 0.83   | 0.00   | 0.00   | 0.00   | 89.58  |



| Name            | S      | Fe     | Cu     | Zn     | As     | Ag     | Cd     | Sb     | Te     | Hg     | Pb     | total  |
|-----------------|--------|--------|--------|--------|--------|--------|--------|--------|--------|--------|--------|--------|
|                 | (wt.%) |
| secondary phase | 27.83  | 0.23   | 51.58  | 0.17   | 15.39  | 0.43   | 0.00   | 0.99   | 0.00   | 0.00   | 0.06   | 96.69  |
| secondary phase | 25.62  | 0.31   | 53.11  | 0.14   | 9.66   | 0.08   | 0.00   | 0.97   | 0.00   | 0.00   | 0.00   | 89.89  |
| secondary phase | 25.45  | 0.53   | 51.40  | 0.26   | 13.39  | 0.27   | 0.00   | 1.48   | 0.00   | 0.00   | 0.00   | 92.78  |
| secondary phase | 23.00  | 0.33   | 52.73  | 0.35   | 8.97   | 0.10   | 0.00   | 0.51   | 0.00   | 0.00   | 0.00   | 85.99  |
| secondary phase | 30.16  | 0.21   | 48.90  | 0.16   | 13.87  | 0.03   | 0.00   | 0.29   | 0.00   | 0.00   | 0.00   | 93.61  |
| secondary phase | 20.26  | 1.21   | 47.38  | 0.23   | 9.71   | 0.00   | 0.00   | 0.13   | 0.00   | 0.00   | 0.00   | 78.93  |
| secondary phase | 22.61  | 1.29   | 45.98  | 0.20   | 11.44  | 0.00   | 0.00   | 0.00   | 0.00   | 0.00   | 0.00   | 81.52  |
| secondary phase | 18.21  | 1.99   | 46.81  | 0.49   | 5.65   | 0.00   | 0.00   | 0.03   | 0.00   | 0.00   | 0.00   | 73.17  |
| secondary phase | 24.54  | 0.77   | 48.03  | 0.23   | 8.94   | 0.28   | 0.00   | 0.00   | 0.00   | 0.00   | 0.00   | 82.79  |
| secondary phase | 21.59  | 0.77   | 45.20  | 0.30   | 4.67   | 0.00   | 0.00   | 0.00   | 0.00   | 0.00   | 0.00   | 72.52  |
| secondary phase | 25.32  | 1.24   | 50.90  | 0.31   | 10.73  | 0.00   | 0.00   | 0.94   | 0.00   | 0.00   | 0.00   | 89.44  |
| secondary phase | 29.36  | 0.68   | 48.56  | 0.18   | 14.78  | 0.15   | 0.00   | 1.33   | 0.00   | 0.00   | 0.00   | 95.04  |
| secondary phase | 25.67  | 1.24   | 47.33  | 0.28   | 17.10  | 0.26   | 0.07   | 1.46   | 0.00   | 0.00   | 0.00   | 93.40  |
| secondary phase | 27.58  | 0.40   | 51.52  | 0.08   | 17.06  | 0.16   | 0.00   | 1.74   | 0.00   | 0.00   | 0.00   | 98.54  |
| secondary phase | 25.17  | 0.79   | 48.66  | 0.34   | 15.69  | 0.12   | 0.00   | 0.82   | 0.00   | 0.00   | 0.00   | 91.60  |
| secondary phase | 13.57  | 1.36   | 46.37  | 0.43   | 3.71   | 0.00   | 0.00   | 0.49   | 0.00   | 0.00   | 0.00   | 65.95  |
| secondary phase | 25.40  | 1.01   | 48.10  | 0.33   | 9.35   | 0.00   | 0.00   | 1.37   | 0.00   | 0.00   | 0.00   | 85.57  |
| secondary phase | 27.66  | 0.27   | 51.92  | 0.05   | 17.75  | 0.00   | 0.00   | 1.44   | 0.00   | 0.00   | 0.00   | 99.08  |
